# Supplementary material for: EEG/ERP evidence of possible hyperexcitability in older adults with elevated beta-amyloid
Source: Springer Nature journal article supplement (doi:10.1186/s40035-022-00282-5), 2022-02-09
Supplement: MOESM1 [file 20118610]

| Supplementary Table 1. Mean $\pm$ standard deviation of the grand average P3 peak amplitude of CNA $\beta$ <sup>+</sup> and CNA $\beta$ <sup>-</sup> at Fz/Cz/Pz across testing conditions |            |                                                          |                                                           |
|--------------------------------------------------------------------------------------------------------------------------------------------------------------------------------------------|------------|----------------------------------------------------------|-----------------------------------------------------------|
| Variables                                                                                                                                                                                  |            | CNA $\beta$ <sup>+</sup> (n= 17)<br>Mean $\pm$ Std. Dev. | CNA $\beta$ <sup>-</sup> (n = 17)<br>Mean $\pm$ Std. Dev. |
| Fz Amplitude ( $\mu$ V)                                                                                                                                                                    |            |                                                          |                                                           |
| 0-back                                                                                                                                                                                     | Nontarget  | 2.068 $\pm$ 3.312                                        | 4.156 $\pm$ 3.124                                         |
|                                                                                                                                                                                            | Target     | 4.374 $\pm$ 3.701                                        | 5.302 $\pm$ 3.825                                         |
|                                                                                                                                                                                            | Difference | -0.437 $\pm$ 2.447                                       | 3.616 $\pm$ 2.471                                         |
| 1-back                                                                                                                                                                                     | Nontarget  | 3.248 $\pm$ 4.574                                        | 4.748 $\pm$ 8.184                                         |
|                                                                                                                                                                                            | Target     | 3.758 $\pm$ 4.620                                        | 2.962 $\pm$ 4.370                                         |
|                                                                                                                                                                                            | Difference | 1.043 $\pm$ 2.187                                        | 3.170 $\pm$ 6.262                                         |
| 2-back                                                                                                                                                                                     | Nontarget  | 2.686 $\pm$ 2.211                                        | 3.669 $\pm$ 6.709                                         |
|                                                                                                                                                                                            | Target     | 3.914 $\pm$ 3.309                                        | 2.358 $\pm$ 2.694                                         |
|                                                                                                                                                                                            | Difference | 0.537 $\pm$ 1.592                                        | 1.851 $\pm$ 5.785                                         |
| Cz Amplitude ( $\mu$ V)                                                                                                                                                                    |            |                                                          |                                                           |
| 0-back                                                                                                                                                                                     | Nontarget  | 2.424 $\pm$ 1.990                                        | 4.416 $\pm$ 7.628                                         |
|                                                                                                                                                                                            | Target     | 2.325 $\pm$ 2.980                                        | 3.018 $\pm$ 1.452                                         |
|                                                                                                                                                                                            | Difference | 0.484 $\pm$ 2.931                                        | 1.887 $\pm$ 6.130                                         |
| 1-back                                                                                                                                                                                     | Nontarget  | 2.794 $\pm$ 2.187                                        | 2.978 $\pm$ 2.126                                         |
|                                                                                                                                                                                            | Target     | 2.405 $\pm$ 3.056                                        | 2.264 $\pm$ 2.208                                         |
|                                                                                                                                                                                            | Difference | 1.078 $\pm$ 2.931                                        | 1.887 $\pm$ 5.785                                         |
| 2-back                                                                                                                                                                                     | Nontarget  | 1.762 $\pm$ 1.508                                        | 1.926 $\pm$ 6.730                                         |
|                                                                                                                                                                                            | Target     | 2.475 $\pm$ 2.574                                        | 1.821 $\pm$ 4.806                                         |
|                                                                                                                                                                                            | Difference | 0.314 $\pm$ 1.464                                        | 0.726 $\pm$ 2.282                                         |
| Pz Amplitude ( $\mu$ V)                                                                                                                                                                    |            |                                                          |                                                           |
| 0-back                                                                                                                                                                                     | Nontarget  | 1.246 $\pm$ 1.709                                        | 1.364 $\pm$ 1.362                                         |
|                                                                                                                                                                                            | Target     | 2.646 $\pm$ 1.766                                        | 3.493 $\pm$ 3.123                                         |
|                                                                                                                                                                                            | Difference | 0.333 $\pm$ 2.266                                        | 0.589 $\pm$ 2.100                                         |
| 1-back                                                                                                                                                                                     | Nontarget  | 2.035 $\pm$ 2.657                                        | 1.958 $\pm$ 1.571                                         |
|                                                                                                                                                                                            | Target     | 2.410 $\pm$ 2.540                                        | 3.068 $\pm$ 2.747                                         |
|                                                                                                                                                                                            | Difference | 0.499 $\pm$ 1.909                                        | 0.409 $\pm$ 1.401                                         |
| 2-back                                                                                                                                                                                     | Nontarget  | 1.093 $\pm$ 1.9656                                       | 2.144 $\pm$ 2.281                                         |
|                                                                                                                                                                                            | Target     | 1.021 $\pm$ 2.130                                        | 2.226 $\pm$ 2.121                                         |
|                                                                                                                                                                                            | Difference | 0.824 $\pm$ 1.621                                        | 0.733 $\pm$ 1.178                                         |
| Abbreviations: CNA $\beta$ , cognitively normal, beta-amyloid                                                                                                                              |            |                                                          |                                                           |

| Supplementary Table 2. Peak P3 latency at Fz/Cz/Pz across testing conditions of CNA $\beta$ <sup>+</sup> and CNA $\beta$ <sup>-</sup> |            |                                                  |                                                  |
|---------------------------------------------------------------------------------------------------------------------------------------|------------|--------------------------------------------------|--------------------------------------------------|
| Variables                                                                                                                             |            | CNA $\beta$ <sup>+</sup><br>Mean $\pm$ Std. Dev. | CNA $\beta$ <sup>-</sup><br>Mean $\pm$ Std. Dev. |
| Fz Latency (ms)                                                                                                                       |            |                                                  |                                                  |
| 0-back                                                                                                                                | Nontarget  | 418 $\pm$ 82                                     | 461 $\pm$ 80                                     |
|                                                                                                                                       | Target     | 399 $\pm$ 91                                     | 405 $\pm$ 98                                     |
|                                                                                                                                       | Difference | 497 $\pm$ 83                                     | 470 $\pm$ 84                                     |
| 1-back                                                                                                                                | Nontarget  | 415 $\pm$ 81                                     | 461 $\pm$ 80                                     |
|                                                                                                                                       | Target     | 401 $\pm$ 90                                     | 403 $\pm$ 100                                    |
|                                                                                                                                       | Difference | 491 $\pm$ 85                                     | 469 $\pm$ 84                                     |
| 2-back                                                                                                                                | Nontarget  | 418 $\pm$ 79                                     | 463 $\pm$ 81                                     |
|                                                                                                                                       | Target     | 404 $\pm$ 92                                     | 403 $\pm$ 100                                    |
|                                                                                                                                       | Difference | 490 $\pm$ 86                                     | 476 $\pm$ 78                                     |
| Cz Latency (ms)                                                                                                                       |            |                                                  |                                                  |
| 0-back                                                                                                                                | Nontarget  | 420 $\pm$ 86                                     | 455 $\pm$ 89                                     |
|                                                                                                                                       | Target     | 409 $\pm$ 86                                     | 431 $\pm$ 89                                     |
|                                                                                                                                       | Difference | 476 $\pm$ 99                                     | 438 $\pm$ 104                                    |
| 1-back                                                                                                                                | Nontarget  | 416 $\pm$ 85                                     | 452 $\pm$ 93                                     |
|                                                                                                                                       | Target     | 413 $\pm$ 86                                     | 429 $\pm$ 89                                     |
|                                                                                                                                       | Difference | 472 $\pm$ 98                                     | 443 $\pm$ 103                                    |
| 2-back                                                                                                                                | Nontarget  | 418 $\pm$ 84                                     | 458 $\pm$ 90                                     |
|                                                                                                                                       | Target     | 417 $\pm$ 90                                     | 426 $\pm$ 92                                     |
|                                                                                                                                       | Difference | 471 $\pm$ 98                                     | 450 $\pm$ 101                                    |
| Pz Latency (ms)                                                                                                                       |            |                                                  |                                                  |
| 0-back                                                                                                                                | Nontarget  | 380 $\pm$ 108                                    | 404 $\pm$ 114                                    |
|                                                                                                                                       | Target     | 408 $\pm$ 82                                     | 404 $\pm$ 93                                     |
|                                                                                                                                       | Difference | 421 $\pm$ 122                                    | 387 $\pm$ 112                                    |
| 1-back                                                                                                                                | Nontarget  | 379 $\pm$ 105                                    | 404 $\pm$ 113                                    |
|                                                                                                                                       | Target     | 406 $\pm$ 83                                     | 403 $\pm$ 93                                     |
|                                                                                                                                       | Difference | 421 $\pm$ 122                                    | 391 $\pm$ 115                                    |
| 2-back                                                                                                                                | Nontarget  | 377 $\pm$ 106                                    | 411 $\pm$ 115                                    |
|                                                                                                                                       | Target     | 410 $\pm$ 84                                     | 405 $\pm$ 95                                     |
|                                                                                                                                       | Difference | 415 $\pm$ 121                                    | 400 $\pm$ 118                                    |
| Abbreviations: CNA $\beta$ , cognitively normal, beta-amyloid                                                                         |            |                                                  |                                                  |

Supplementary Table 3. Event-related power ( $\mu\text{V}/\text{Hz}^2$ ) of CNA $\beta$ + (n = 17) and CNA $\beta$ - (n = 17) at Fz/Cz/Pz, across testing conditions. (Mean  $\pm$  Std. Dev.)

|            |            | Fz Channel        |                    | Cz Channel        |                    | Pz Channel        |                    |
|------------|------------|-------------------|--------------------|-------------------|--------------------|-------------------|--------------------|
|            |            | CNA $\beta$ +     | CNA $\beta$ -      | CNA $\beta$ +     | CNA $\beta$ -      | CNA $\beta$ +     | CNA $\beta$ -      |
| Delta Band |            |                   |                    |                   |                    |                   |                    |
| 0-back     | Nontarget  | 0.443 $\pm$ 0.455 | 1.916 $\pm$ 3.681  | 0.328 $\pm$ 0.322 | 0.601 $\pm$ 1.111  | 0.086 $\pm$ 0.132 | 0.096 $\pm$ 0.153  |
|            | Target     | 0.371 $\pm$ 0.328 | 3.763 $\pm$ 3.979  | 0.285 $\pm$ 0.305 | 1.519 $\pm$ 5.064  | 0.207 $\pm$ 0.289 | 0.319 $\pm$ 0.799  |
|            | Difference | 0.397 $\pm$ 0.390 | -1.288 $\pm$ 1.392 | 0.129 $\pm$ 0.131 | -0.800 $\pm$ 4.018 | 0.128 $\pm$ 0.215 | -0.043 $\pm$ 0.709 |
| 1-back     | Nontarget  | 0.600 $\pm$ 0.787 | 1.343 $\pm$ 2.841  | 0.289 $\pm$ 0.352 | 0.273 $\pm$ 0.217  | 0.078 $\pm$ 0.081 | 0.069 $\pm$ 0.086  |
|            | Target     | 0.593 $\pm$ 1.206 | 0.359 $\pm$ 0.464  | 0.167 $\pm$ 0.158 | 0.199 $\pm$ 0.189  | 0.140 $\pm$ 0.174 | 0.142 $\pm$ 0.237  |
|            | Difference | 0.526 $\pm$ 0.937 | 1.455 $\pm$ 3.763  | 0.150 $\pm$ 0.224 | 0.116 $\pm$ 0.149  | 0.124 $\pm$ 0.164 | 0.073 $\pm$ 0.100  |
| 2-back     | Nontarget  | 0.309 $\pm$ 0.286 | 2.217 $\pm$ 6.668  | 0.213 $\pm$ 0.308 | 0.364 $\pm$ 0.718  | 0.059 $\pm$ 0.091 | 0.087 $\pm$ 0.105  |
|            | Target     | 0.413 $\pm$ 0.580 | 0.797 $\pm$ 2.353  | 0.245 $\pm$ 0.449 | 0.223 $\pm$ 0.381  | 0.100 $\pm$ 0.176 | 0.059 $\pm$ 0.064  |
|            | Difference | 0.215 $\pm$ 0.314 | 1.518 $\pm$ 4.346  | 0.072 $\pm$ 0.082 | 0.135 $\pm$ 0.334  | 0.046 $\pm$ 0.073 | 0.034 $\pm$ 0.059  |
| Theta Band |            |                   |                    |                   |                    |                   |                    |
| 0-back     | Nontarget  | 0.168 $\pm$ 0.145 | 0.208 $\pm$ 0.202  | 0.117 $\pm$ 0.167 | 0.102 $\pm$ 0.095  | 0.039 $\pm$ 0.081 | 0.022 $\pm$ 0.026  |
|            | Target     | 0.145 $\pm$ 0.096 | 0.278 $\pm$ 0.539  | 0.107 $\pm$ 0.133 | 0.126 $\pm$ 0.206  | 0.051 $\pm$ 0.088 | 0.033 $\pm$ 0.046  |
|            | Difference | 0.085 $\pm$ 0.073 | -0.006 $\pm$ 0.368 | 0.050 $\pm$ 0.064 | 0.001 $\pm$ 0.130  | 0.035 $\pm$ 0.048 | 0.007 $\pm$ 0.027  |
| 1-back     | Nontarget  | 0.236 $\pm$ 0.230 | 0.167 $\pm$ 0.096  | 0.150 $\pm$ 0.204 | 0.085 $\pm$ 0.052  | 0.049 $\pm$ 0.089 | 0.023 $\pm$ 0.026  |
|            | Target     | 0.182 $\pm$ 0.136 | 0.151 $\pm$ 0.155  | 0.128 $\pm$ 0.167 | 0.079 $\pm$ 0.048  | 0.051 $\pm$ 0.089 | 0.030 $\pm$ 0.038  |
|            | Difference | 0.125 $\pm$ 0.264 | 0.081 $\pm$ 0.122  | 0.040 $\pm$ 0.057 | 0.027 $\pm$ 0.019  | 0.027 $\pm$ 0.048 | 0.018 $\pm$ 0.024  |
| 2-back     | Nontarget  | 0.203 $\pm$ 0.193 | 0.222 $\pm$ 0.391  | 0.148 $\pm$ 0.196 | 0.072 $\pm$ 0.059  | 0.055 $\pm$ 0.114 | 0.016 $\pm$ 0.018  |
|            | Target     | 0.185 $\pm$ 0.166 | 0.189 $\pm$ 0.351  | 0.140 $\pm$ 0.179 | 0.062 $\pm$ 0.052  | 0.054 $\pm$ 0.104 | 0.020 $\pm$ 0.023  |
|            | Difference | 0.050 $\pm$ 0.069 | 0.052 $\pm$ 0.063  | 0.035 $\pm$ 0.062 | 0.015 $\pm$ 0.012  | 0.017 $\pm$ 0.021 | 0.009 $\pm$ 0.011  |

|                                                      |            |               |               |               |               |               |               |
|------------------------------------------------------|------------|---------------|---------------|---------------|---------------|---------------|---------------|
| Alpha Band                                           |            |               |               |               |               |               |               |
| 0-back                                               | Nontarget  | 0.050 ± 0.041 | 0.052 ± 0.054 | 0.034 ± 0.037 | 0.029 ± 0.031 | 0.018 ± 0.032 | 0.008 ± 0.009 |
|                                                      | Target     | 0.085 ± 0.070 | 0.083 ± 0.089 | 0.061 ± 0.075 | 0.046 ± 0.047 | 0.025 ± 0.038 | 0.013 ± 0.017 |
|                                                      | Difference | 0.039 ± 0.034 | 0.017 ± 0.053 | 0.031 ± 0.037 | 0.011 ± 0.030 | 0.018 ± 0.031 | 0.009 ± 0.020 |
| 1-back                                               | Nontarget  | 0.059 ± 0.045 | 0.046 ± 0.036 | 0.045 ± 0.052 | 0.026 ± 0.019 | 0.016 ± 0.024 | 0.008 ± 0.008 |
|                                                      | Target     | 0.075 ± 0.070 | 0.060 ± 0.051 | 0.056 ± 0.076 | 0.035 ± 0.024 | 0.024 ± 0.045 | 0.012 ± 0.012 |
|                                                      | Difference | 0.028 ± 0.022 | 0.030 ± 0.033 | 0.019 ± 0.024 | 0.016 ± 0.017 | 0.010 ± 0.015 | 0.007 ± 0.005 |
| 2-back                                               | Nontarget  | 0.055 ± 0.056 | 0.039 ± 0.024 | 0.045 ± 0.061 | 0.022 ± 0.016 | 0.019 ± 0.036 | 0.006 ± 0.007 |
|                                                      | Target     | 0.084 ± 0.091 | 0.048 ± 0.034 | 0.065 ± 0.084 | 0.026 ± 0.018 | 0.023 ± 0.037 | 0.013 ± 0.017 |
|                                                      | Difference | 0.034 ± 0.049 | 0.015 ± 0.022 | 0.019 ± 0.028 | 0.008 ± 0.009 | 0.008 ± 0.010 | 0.009 ± 0.016 |
| Beta Band                                            |            |               |               |               |               |               |               |
| 0-back                                               | Nontarget  | 0.006 ± 0.007 | 0.007 ± 0.007 | 0.004 ± 0.006 | 0.003 ± 0.003 | 0.002 ± 0.002 | 0.001 ± 0.001 |
|                                                      | Target     | 0.009 ± 0.007 | 0.014 ± 0.015 | 0.005 ± 0.006 | 0.006 ± 0.006 | 0.002 ± 0.002 | 0.003 ± 0.003 |
|                                                      | Difference | 0.009 ± 0.007 | 0.010 ± 0.015 | 0.006 ± 0.006 | 0.004 ± 0.006 | 0.003 ± 0.002 | 0.003 ± 0.005 |
| 1-back                                               | Nontarget  | 0.006 ± 0.004 | 0.005 ± 0.003 | 0.004 ± 0.004 | 0.003 ± 0.002 | 0.002 ± 0.003 | 0.002 ± 0.001 |
|                                                      | Target     | 0.009 ± 0.008 | 0.008 ± 0.005 | 0.005 ± 0.005 | 0.004 ± 0.003 | 0.003 ± 0.004 | 0.002 ± 0.002 |
|                                                      | Difference | 0.009 ± 0.009 | 0.009 ± 0.007 | 0.006 ± 0.007 | 0.005 ± 0.004 | 0.003 ± 0.003 | 0.003 ± 0.002 |
| 2-back                                               | Nontarget  | 0.006 ± 0.004 | 0.005 ± 0.003 | 0.004 ± 0.004 | 0.003 ± 0.002 | 0.002 ± 0.002 | 0.002 ± 0.001 |
|                                                      | Target     | 0.012 ± 0.016 | 0.008 ± 0.006 | 0.007 ± 0.012 | 0.004 ± 0.002 | 0.004 ± 0.005 | 0.003 ± 0.003 |
|                                                      | Difference | 0.013 ± 0.019 | 0.007 ± 0.008 | 0.008 ± 0.016 | 0.004 ± 0.004 | 0.004 ± 0.005 | 0.003 ± 0.004 |
| Abbreviations: CNAβ, cognitively normal beta-amyloid |            |               |               |               |               |               |               |
